# Supplementary material
Source: MDPI journal article supplement (https://www.mdpi.com/2571-905X/4/3/37)
Supplement: s1 [file s1]

# Supplementary Materials: Smoothing in Ordinal Regression

Ejike R. Ugba, Daniel Mörlein and Jan Gertheiss

The following supplementary figures give the contour plots of the odds (on log scale) of sensory perception of boar taint under NPOM, SERP and POM for each panelist A – J in analogy to Figure 2, 3 and 6 in the main article.

## 1. Panelist-A

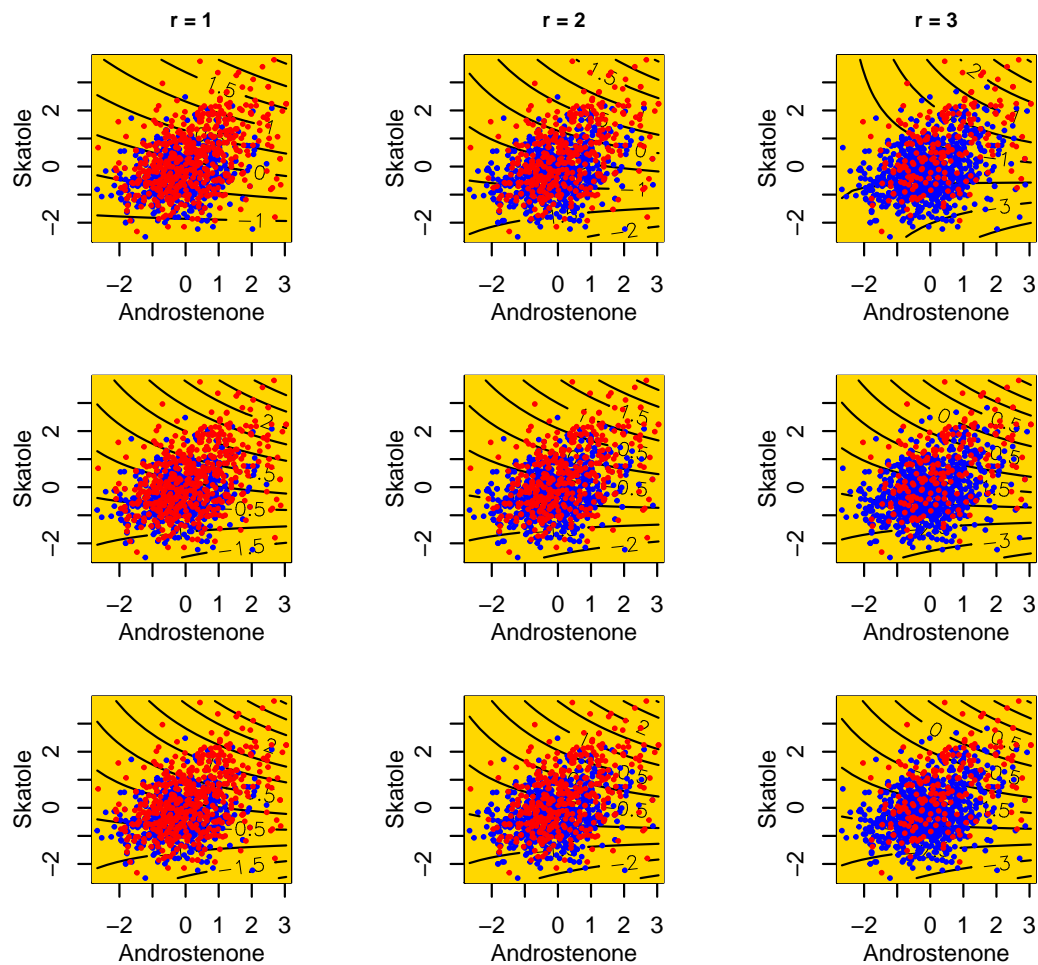

**Figure S1.** Fitted log-odds of sensory perception of boar taint under NPOM (upper row), SERP (middle row) and POM (lower row), having androstenone and skatole (both log-transformed, standardized), plus interaction as explanatory variables. Each column denotes the log-odds of the first panelist's (A) rating falling into the upper categories with cut-point  $r \in \{1, 2, 3\}$  (column 1 to 3). The data observed is drawn as colored dots, where  $Y_i > r$  (red dots) and  $Y_i \leq r$  (blue dots).

## 2. Panelist-B

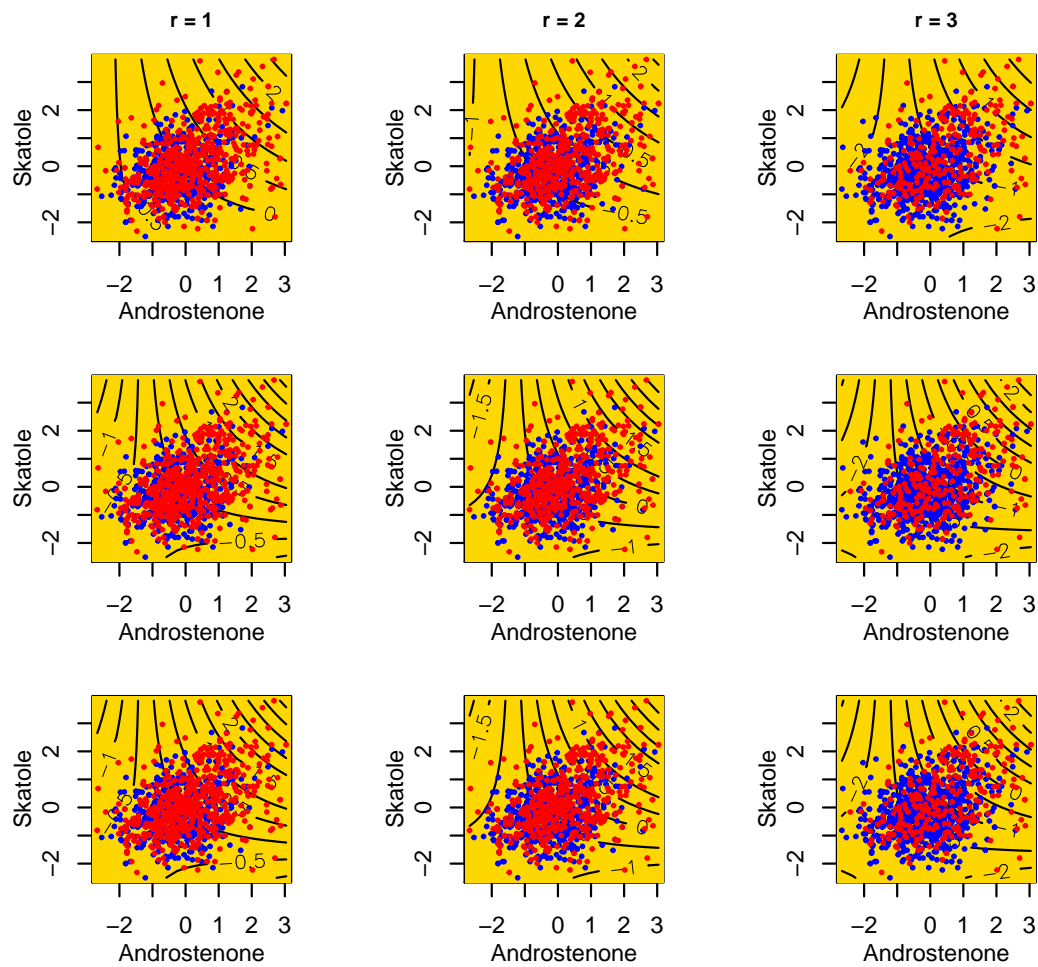

**Figure S2.** Fitted log-odds of sensory perception of boar taint under NPOM (upper row), SERP (middle row) and POM (lower row), having androstenone and skatole (both log-transformed, standardized), plus interaction as explanatory variables. Each column denotes the log-odds of the second panelist's (B) rating falling into the upper categories with cut-point  $r \in \{1, 2, 3\}$  (column 1 to 3). The data observed is drawn as colored dots, where  $Y_i > r$  (red dots) and  $Y_i \leq r$  (blue dots).

### 3. Panelist-C

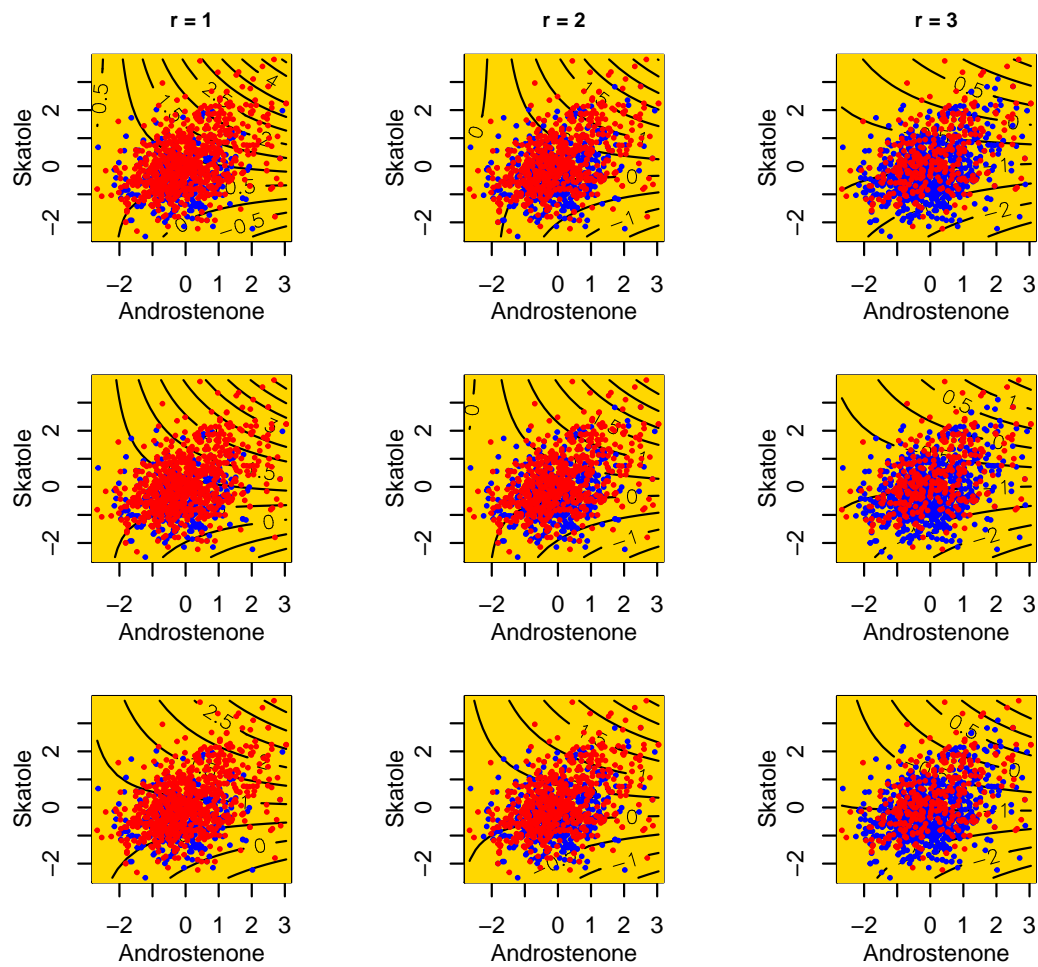

**Figure S3.** Fitted log-odds of sensory perception of boar taint under NPOM (upper row), SERP (middle row) and POM (lower row), having androstenone and skatole (both log-transformed, standardized), plus interaction as explanatory variables. Each column denotes the log-odds of the third panelist's (C) rating falling into the upper categories with cut-point  $r \in \{1, 2, 3\}$  (column 1 to 3). The data observed is drawn as colored dots, where  $Y_i > r$  (red dots) and  $Y_i \leq r$  (blue dots).

## 4. Panelist-D

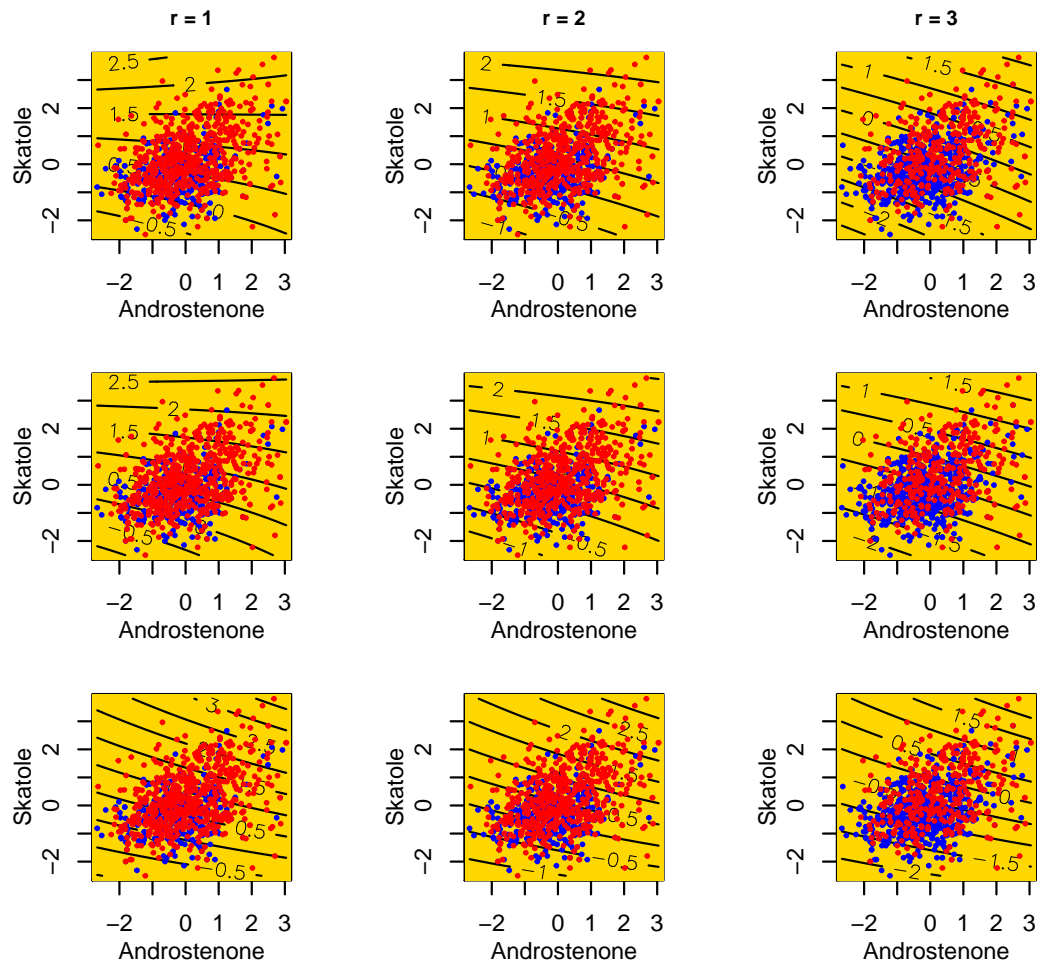

**Figure S4.** Fitted log-odds of sensory perception of boar taint under NPOM (upper row), SERP (middle row) and POM (lower row), having androstenone and skatole (both log-transformed, standardized), plus interaction as explanatory variables. Each column denotes the log-odds of the fourth panelist's (D) rating falling into the upper categories with cut-point  $r \in \{1, 2, 3\}$  (column 1 to 3). The data observed is drawn as colored dots, where  $Y_i > r$  (red dots) and  $Y_i \leq r$  (blue dots).

## 5. Panelist-E

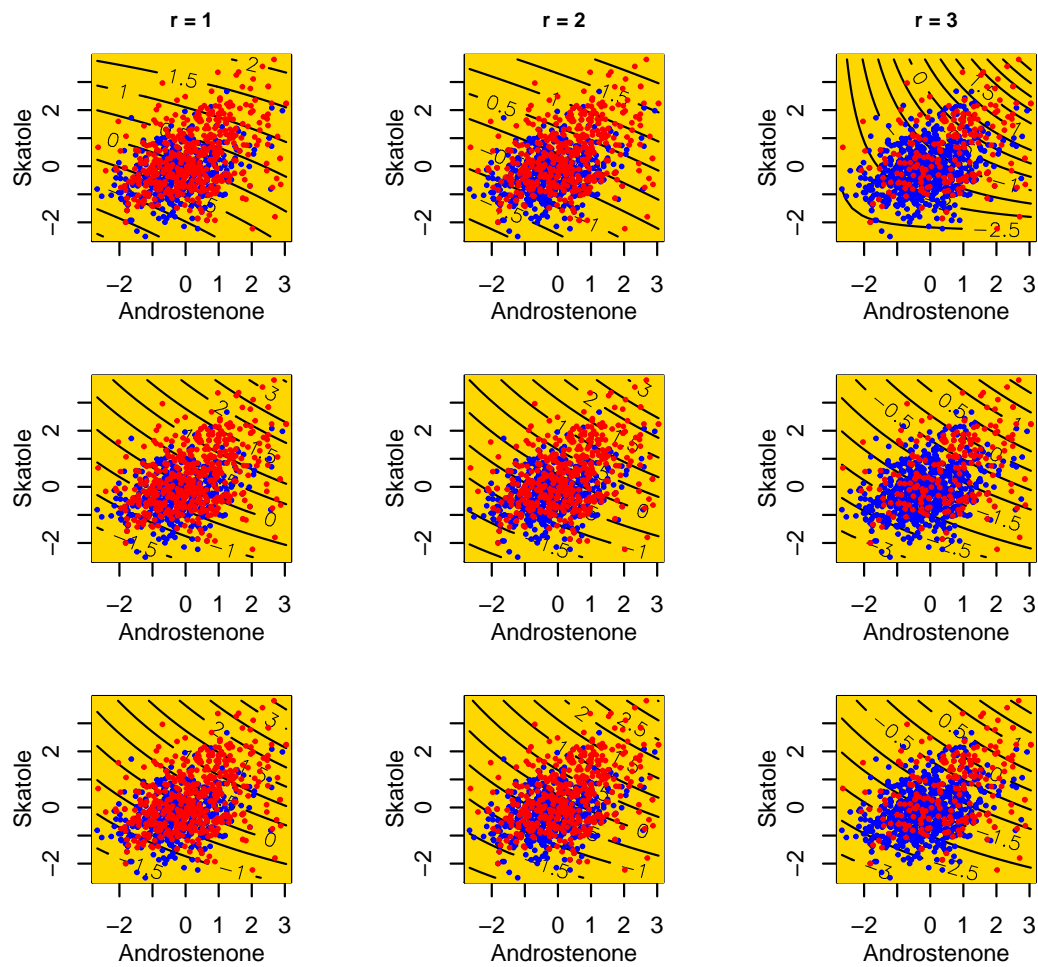

**Figure S5.** Fitted log-odds of sensory perception of boar taint under NPOM (upper row), SERP (middle row) and POM (lower row), having androstenone and skatole (both log-transformed, standardized), plus interaction as explanatory variables. Each column denotes the log-odds of the fifth panelist's (E) rating falling into the upper categories with cut-point  $r \in \{1, 2, 3\}$  (column 1 to 3). The data observed is drawn as colored dots, where  $Y_i > r$  (red dots) and  $Y_i \leq r$  (blue dots).

## 6. Panelist-F

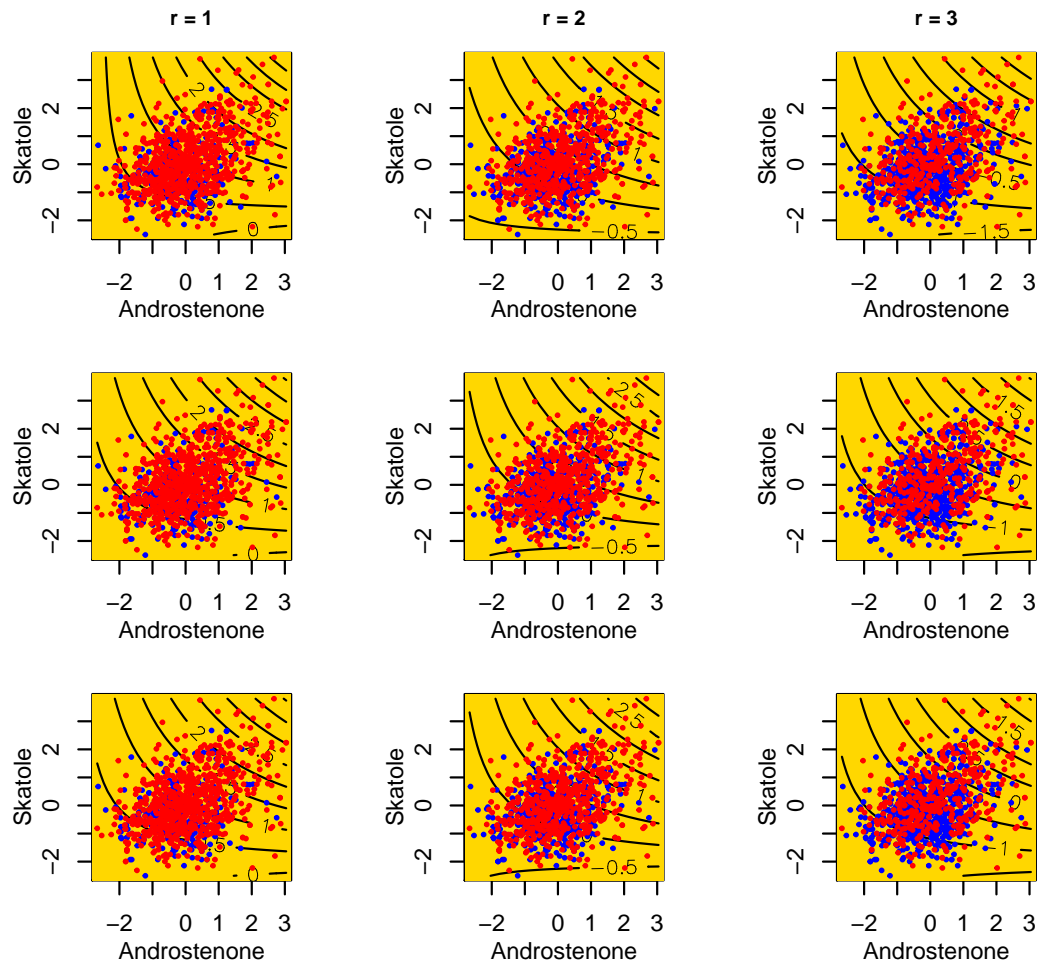

**Figure S6.** Fitted log-odds of sensory perception of boar taint under NPOM (upper row), SERP (middle row) and POM (lower row), having androstenone and skatole (both log-transformed, standardized), plus interaction as explanatory variables. Each column denotes the log-odds of the sixth panelist's (F) rating falling into the upper categories with cut-point  $r \in \{1, 2, 3\}$  (column 1 to 3). The data observed is drawn as colored dots, where  $Y_i > r$  (red dots) and  $Y_i \leq r$  (blue dots).

## 7. Panelist-G

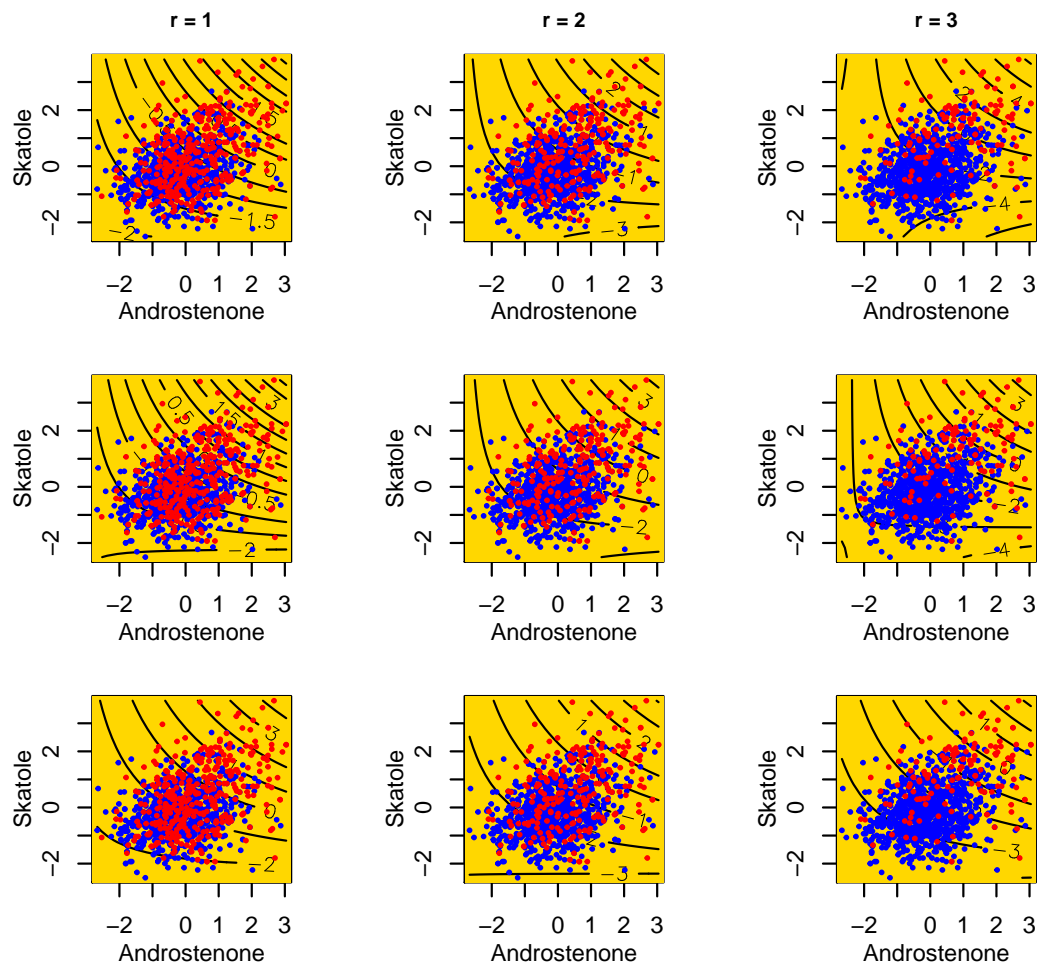

**Figure S7.** Fitted log-odds of sensory perception of boar taint under NPOM (upper row), SERP (middle row) and POM (lower row), having androstenone and skatole (both log-transformed, standardized), plus interaction as explanatory variables. Each column denotes the log-odds of the seventh panelist's (G) rating falling into the upper categories with cut-point  $r \in \{1, 2, 3\}$  (column 1 to 3). The data observed is drawn as colored dots, where  $Y_i > r$  (red dots) and  $Y_i \leq r$  (blue dots).

## 8. Panelist-H

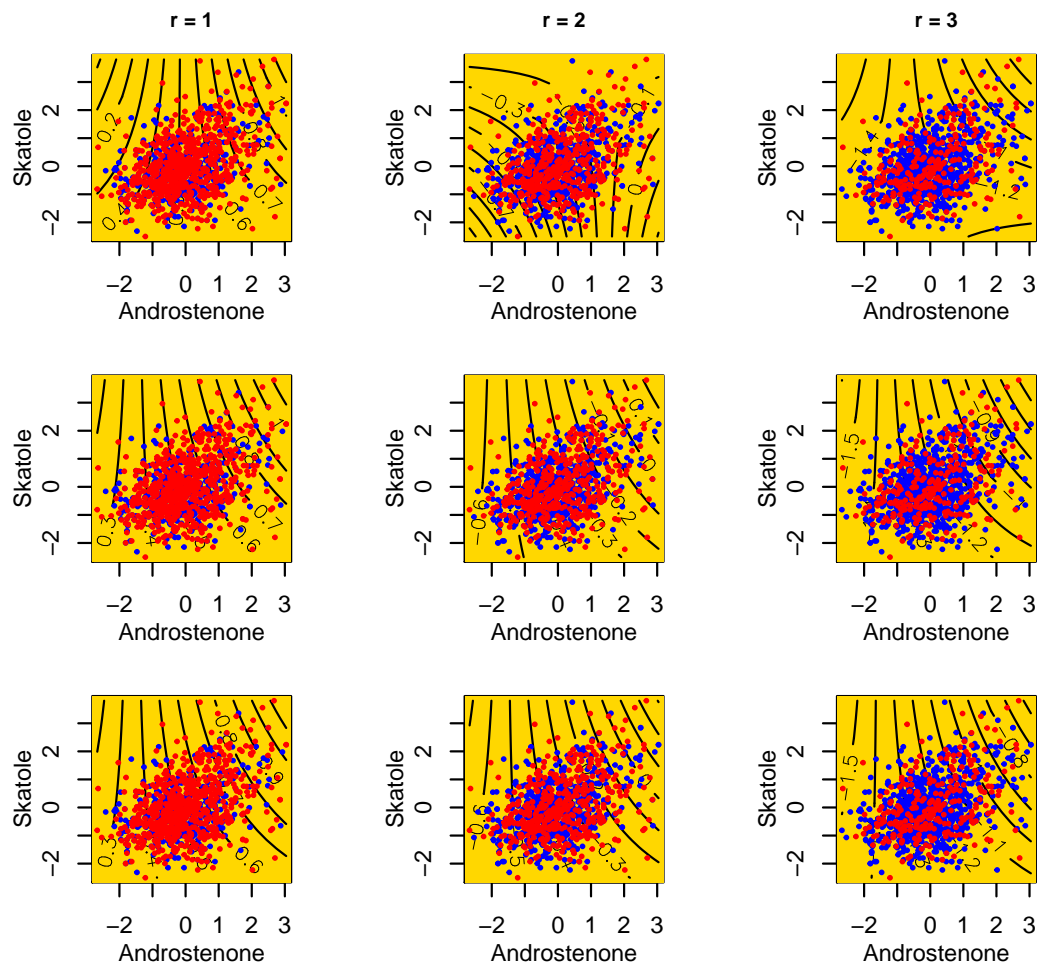

**Figure S8.** Fitted log-odds of sensory perception of boar taint under NPOM (upper row), SERP (middle row) and POM (lower row), having androstenone and skatole (both log-transformed, standardized), plus interaction as explanatory variables. Each column denotes the log-odds of the eighth panelist's (**H**) rating falling into the upper categories with cut-point  $r \in \{1, 2, 3\}$  (column 1 to 3). The data observed is drawn as colored dots, where  $Y_i > r$  (red dots) and  $Y_i \leq r$  (blue dots).



**Figure S9.** Fitted log-odds of sensory perception of boar taint under NPOM (upper row), SERP (middle row) and POM (lower row), having androstenone and skatole (both log-transformed, standardized), plus interaction as explanatory variables. Each column denotes the log-odds of the ninth panelist's (I) rating falling into the upper categories with cut-point  $r \in \{1, 2, 3\}$  (column 1 to 3). The data observed is drawn as colored dots, where  $Y_i > r$  (red dots) and  $Y_i \leq r$  (blue dots).

**10. Panelist-J**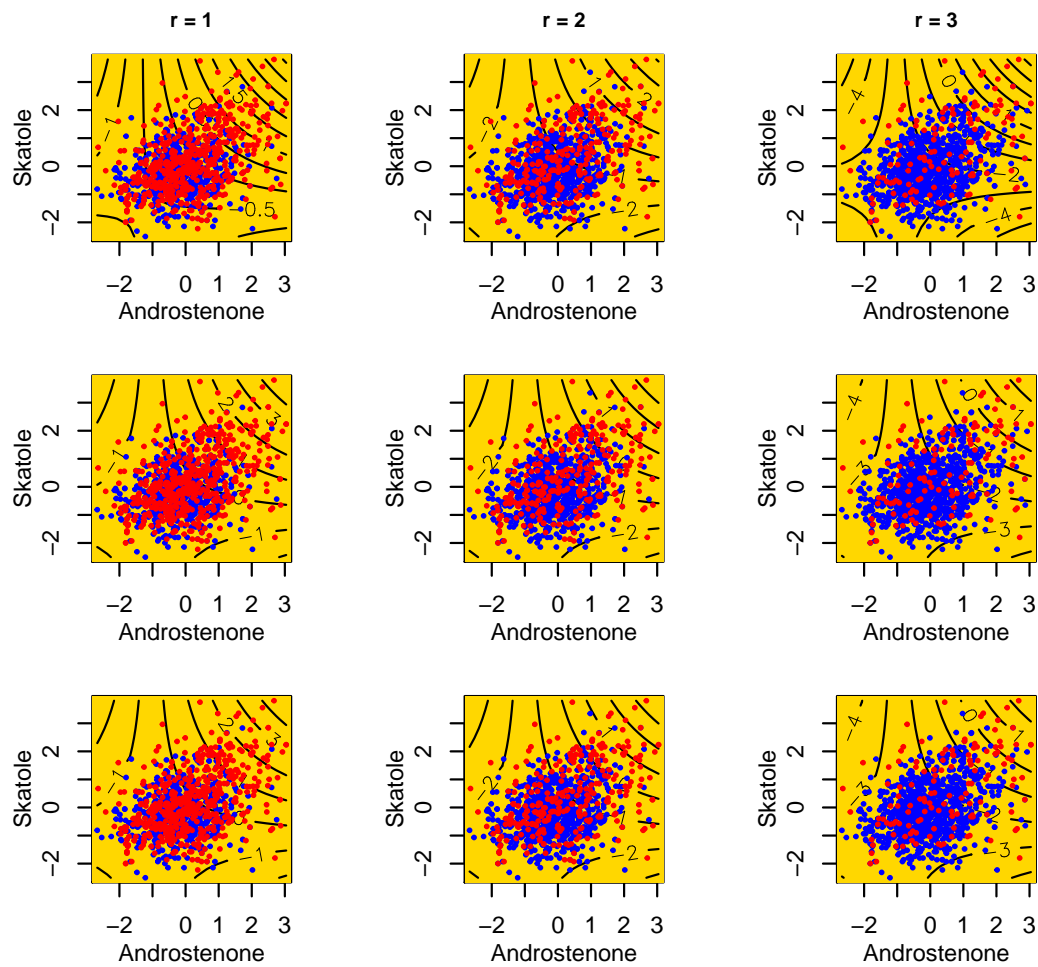

**Figure S10.** Fitted log-odds of sensory perception of boar taint under NPOM (upper row), SERP (middle row) and POM (lower row), having androstenone and skatole (both log-transformed, standardized), plus interaction as explanatory variables. Each column denotes the log-odds of the tenth panelist's (J) rating falling into the upper categories with cut-point  $r \in \{1, 2, 3\}$  (column 1 to 3). The data observed is drawn as colored dots, where  $Y_i > r$  (red dots) and  $Y_i \leq r$  (blue dots).
